# Supplementary material
Source: Springer Nature journal article supplement (https://www.springermedizin.de/resource/supplementary/12961_2009_149_MOESM1_ESM.pdf/9571546)
Supplement: MOESM1 [file 9571546]

## **Municipal responsibilities under the WCPV act:**

- Attuning prevention to curative medicine
- Epidemiological assessment of the health status of the population
- Monitoring health aspects of administrative decisions
- Health promotion and health education
- Environmental health care
- Technical hygiene to control microbial threats
- Public mental health care, including a safety net for vulnerable persons and refugees
- Surveillance and control of infectious diseases, including aids, sexually transmitted diseases and tuberculosis
- Preventive youth healthcare
